# Supplementary material for: Emergence of social behavior deficit, blunted corticolimbic activity and adult depression-like behavior in a rodent model of maternal maltreatment
Source: PubMed Central journal article supplement (PMC5290349; doi:10.1038/tp.2016.205), 2016-10-25
Supplement: tp2016205x1.pdf [file tp2016205x1.pdf]

**Table 1. Negative maternal and pup behaviors observed during the low bedding (i.e. maltreatment) procedure.**

|                           | <b>Control Mother</b> | <b>Maltreating Mother</b> |
|---------------------------|-----------------------|---------------------------|
| <b>Maternal behaviors</b> |                       |                           |
| Step on pups              | 0.00%                 | 15.28%                    |
| Drag pups                 | 1.39%                 | 9.72%                     |
| Rough handling            | 1.39%                 | 13.19%                    |
| <b>Pups vocalization</b>  | 0.00%                 | 16.67%                    |

Values are the percentage of observation periods in which behaviors occurred. Maternal behaviors were recorded (5-minute segments; 30 minute sessions) from PN8-12 during different times of the day (AM/PM). Litters were not disturbed while being observed.
